# Supplementary material for: Causal associations between severe COVID-19 and diseases of seven organs: a proteome-wide mendelian randomization study
Source: Front Genet. 2024 Aug 13;15:1421824. doi: 10.3389/fgene.2024.1421824 (PMC11347274; doi:10.3389/fgene.2024.1421824)
Supplement: Supplementary file 2 [file Table2.XLSX]

## Sheet: Sheet1
STable 2. The SNPs as IVs for COVID-19 in organ-related diseases.
SNP	Effect_allele	Other_allele	POS	CHR	BETA	SE	P.value
Pneumoniae
rs112617645	T	G	94987788	1	0.2662	0.063313	2.6162e-05
rs2076295	T	G	7563232	6	0.060545	0.014542	3.135e-05
rs2469957	A	C	204374764	2	0.059826	0.014386	3.2012e-05
rs62544387	C	G	33163523	9	0.07105	0.017464	4.7359e-05
rs67900645	C	T	8890593	20	0.12389	0.028584	1.4627e-05
rs73586928	A	C	159920952	6	0.14592	0.033159	1.0792e-05
rs76361731	C	T	8528347	3	0.20234	0.046769	1.5161e-05
rs80050884	C	T	158131467	2	0.085003	0.019977	2.0896e-05
Streptococcus pneumoniae
rs112617645	T	G	94987788	1	0.2662	0.063313	2.6162e-05
rs2076295	T	G	7563232	6	0.060545	0.014542	3.135e-05
rs2469957	A	C	204374764	2	0.059826	0.014386	3.2012e-05
rs62544387	C	G	33163523	9	0.07105	0.017464	4.7359e-05
rs67900645	C	T	8890593	20	0.12389	0.028584	1.4627e-05
rs73586928	A	C	159920952	6	0.14592	0.033159	1.0792e-05
rs76361731	C	T	8528347	3	0.20234	0.046769	1.5161e-05
rs80050884	C	T	158131467	2	0.085003	0.019977	2.0896e-05
Liver diseases
rs111267373	G	C	132316783	9	0.31392	0.075309	3.0676e-05
rs111671068	T	C	55605995	13	0.39208	0.089108	1.0822e-05
rs11740587	C	T	172615342	5	-0.16368	0.038775	2.4299e-05
rs191274258	T	G	27116936	9	0.19579	0.047592	3.8897e-05
rs2068205	T	C	33058583	6	0.062022	0.01442	1.6993e-05
rs2076295	T	G	7563232	6	0.060545	0.014542	3.135e-05
rs62544387	C	G	33163523	9	0.07105	0.017464	4.7359e-05
rs6836239	G	A	186588803	4	-0.26615	0.06077	1.1893e-05
rs7253782	G	T	14875201	19	0.089873	0.020585	1.2655e-05
rs72854949	G	A	138672038	2	-0.11573	0.028394	4.5844e-05
rs72993537	C	T	145550399	6	0.19939	0.041123	1.2433e-06
rs73586928	A	C	159920952	6	0.14592	0.033159	1.0792e-05
rs74738864	T	C	52791214	8	0.089297	0.02033	1.1208e-05
rs76361731	C	T	8528347	3	0.20234	0.046769	1.5161e-05
rs9640291	A	G	151152665	7	0.063235	0.013875	5.1745e-06
Kidney cyst
rs111267373	G	C	132316783	9	0.31392	0.075309	3.0676e-05
rs111671068	T	C	55605995	13	0.39208	0.089108	1.0822e-05
rs112617645	T	G	94987788	1	0.2662	0.063313	2.6162e-05
rs116415481	C	T	155286822	1	0.20909	0.041801	5.6737e-07
rs12407679	C	T	39578167	1	-0.068504	0.014102	1.1882e-06
rs12730151	T	A	200687787	1	0.13861	0.032284	1.7608e-05
rs2076295	T	G	7563232	6	0.060545	0.014542	3.135e-05
rs2505973	A	G	9122669	1	-0.069274	0.014176	1.0251e-06
rs343320	G	A	146234909	3	0.15423	0.027508	2.062e-08
rs4404463	A	G	58522023	3	-0.17016	0.040027	2.1269e-05
rs568035	C	T	156110167	1	0.14307	0.025967	3.5959e-08
rs57266241	C	T	188817058	2	0.075998	0.016712	5.427e-06
rs62544387	C	G	33163523	9	0.07105	0.017464	4.7359e-05
rs72854949	G	A	138672038	2	-0.11573	0.028394	4.5844e-05
rs72993537	C	T	145550399	6	0.19939	0.041123	1.2433e-06
rs73586928	A	C	159920952	6	0.14592	0.033159	1.0792e-05
rs8095448	A	G	25382979	18	0.094305	0.020698	5.2074e-06
rs9260924	A	G	29950289	6	-0.15382	0.035313	1.3262e-05
Other specified disorders of kidney and ureter
rs111267373	G	C	132316783	9	0.31392	0.075309	3.0676e-05
rs111671068	T	C	55605995	13	0.39208	0.089108	1.0822e-05
rs112617645	T	G	94987788	1	0.2662	0.063313	2.6162e-05
rs116415481	C	T	155286822	1	0.20909	0.041801	5.6737e-07
rs12407679	C	T	39578167	1	-0.068504	0.014102	1.1882e-06
rs12730151	T	A	200687787	1	0.13861	0.032284	1.7608e-05
rs2076295	T	G	7563232	6	0.060545	0.014542	3.135e-05
rs2505973	A	G	9122669	1	-0.069274	0.014176	1.0251e-06
rs343320	G	A	146234909	3	0.15423	0.027508	2.062e-08
rs4404463	A	G	58522023	3	-0.17016	0.040027	2.1269e-05
rs568035	C	T	156110167	1	0.14307	0.025967	3.5959e-08
rs57266241	C	T	188817058	2	0.075998	0.016712	5.427e-06
rs62544387	C	G	33163523	9	0.07105	0.017464	4.7359e-05
rs72854949	G	A	138672038	2	-0.11573	0.028394	4.5844e-05
rs72993537	C	T	145550399	6	0.19939	0.041123	1.2433e-06
rs73586928	A	C	159920952	6	0.14592	0.033159	1.0792e-05
rs8095448	A	G	25382979	18	0.094305	0.020698	5.2074e-06
rs9260924	A	G	29950289	6	-0.15382	0.035313	1.3262e-05
Other disorders of kidney and ureter
rs111267373	G	C	132316783	9	0.31392	0.075309	3.0676e-05
rs111671068	T	C	55605995	13	0.39208	0.089108	1.0822e-05
rs112617645	T	G	94987788	1	0.2662	0.063313	2.6162e-05
rs116415481	C	T	155286822	1	0.20909	0.041801	5.6737e-07
rs12407679	C	T	39578167	1	-0.068504	0.014102	1.1882e-06
rs12730151	T	A	200687787	1	0.13861	0.032284	1.7608e-05
rs2076295	T	G	7563232	6	0.060545	0.014542	3.135e-05
rs2505973	A	G	9122669	1	-0.069274	0.014176	1.0251e-06
rs343320	G	A	146234909	3	0.15423	0.027508	2.062e-08
rs4404463	A	G	58522023	3	-0.17016	0.040027	2.1269e-05
rs568035	C	T	156110167	1	0.14307	0.025967	3.5959e-08
rs57266241	C	T	188817058	2	0.075998	0.016712	5.427e-06
rs62544387	C	G	33163523	9	0.07105	0.017464	4.7359e-05
rs72854949	G	A	138672038	2	-0.11573	0.028394	4.5844e-05
rs72993537	C	T	145550399	6	0.19939	0.041123	1.2433e-06
rs73586928	A	C	159920952	6	0.14592	0.033159	1.0792e-05
rs8095448	A	G	25382979	18	0.094305	0.020698	5.2074e-06
rs9260924	A	G	29950289	6	-0.15382	0.035313	1.3262e-05
Hypothyroidism, strict autoimmune
rs112617645	T	G	94987788	1	0.2662	0.063313	2.6162e-05
rs11740587	C	T	172615342	5	-0.16368	0.038775	2.4299e-05
rs148127446	G	A	38721448	5	0.39371	0.091736	1.7729e-05
rs2625446	G	A	61540398	8	0.067381	0.014353	2.6705e-06
rs34712979	G	A	106819053	4	-0.10951	0.01701	1.213e-10
rs57708672	G	T	33571309	17	-0.090779	0.019649	3.8351e-06
rs62544387	C	G	33163523	9	0.07105	0.017464	4.7359e-05
rs72854949	G	A	138672038	2	-0.11573	0.028394	4.5844e-05
rs73586928	A	C	159920952	6	0.14592	0.033159	1.0792e-05
rs74738864	T	C	52791214	8	0.089297	0.02033	1.1208e-05
rs75410063	T	C	7879049	4	0.089503	0.018409	1.1623e-06
Thyroid disorders
rs112617645	T	G	94987788	1	0.2662	0.063313	2.6162e-05
rs11740587	C	T	172615342	5	-0.16368	0.038775	2.4299e-05
rs148127446	G	A	38721448	5	0.39371	0.091736	1.7729e-05
rs2625446	G	A	61540398	8	0.067381	0.014353	2.6705e-06
rs34712979	G	A	106819053	4	-0.10951	0.01701	1.213e-10
rs57708672	G	T	33571309	17	-0.090779	0.019649	3.8351e-06
rs62544387	C	G	33163523	9	0.07105	0.017464	4.7359e-05
rs72854949	G	A	138672038	2	-0.11573	0.028394	4.5844e-05
rs73586928	A	C	159920952	6	0.14592	0.033159	1.0792e-05
rs74738864	T	C	52791214	8	0.089297	0.02033	1.1208e-05
rs75410063	T	C	7879049	4	0.089503	0.018409	1.1623e-06
Graves’ disease
rs112617645	T	G	94987788	1	0.2662	0.063313	2.6162e-05
rs11740587	C	T	172615342	5	-0.16368	0.038775	2.4299e-05
rs148127446	G	A	38721448	5	0.39371	0.091736	1.7729e-05
rs2625446	G	A	61540398	8	0.067381	0.014353	2.6705e-06
rs34712979	G	A	106819053	4	-0.10951	0.01701	1.213e-10
rs57708672	G	T	33571309	17	-0.090779	0.019649	3.8351e-06
rs62544387	C	G	33163523	9	0.07105	0.017464	4.7359e-05
rs72854949	G	A	138672038	2	-0.11573	0.028394	4.5844e-05
rs73586928	A	C	159920952	6	0.14592	0.033159	1.0792e-05
rs74738864	T	C	52791214	8	0.089297	0.02033	1.1208e-05
rs75410063	T	C	7879049	4	0.089503	0.018409	1.1623e-06
