# Supplementary material for: Causal associations between severe COVID-19 and diseases of seven organs: a proteome-wide mendelian randomization study
Source: Front Genet. 2024 Aug 13;15:1421824. doi: 10.3389/fgene.2024.1421824 (PMC11347274; doi:10.3389/fgene.2024.1421824)
Supplement: Supplementary file 3 [file Table3.XLSX]

## Sheet: Sheet1
STable 3. Identification of druggable targets
Organ	Gene	Taget name	Drug name	Associated conditions
Lung	DSP	Desmoplakin	Zinc; Artenimol; Zinc acetate	Diarrhea; Pneumonia; Upper Respiratory Tract Infection; Type 2 Diabetes Mellitus; Acne Vulgaris; Malaria; Wilson’s Disease
	SOD2	Superoxide dismutase [Mn], mitochondrial	Benzylsulfonic acid; 3-Fluoro-L-tyrosine; Mangafodipir; Polaprezinc; Thimerosal; Benzoyl peroxide	Cancer; Neurotoxic Disorders; Multiple Sclerosis; Epilepsy; Influenza; Viral Hepatitis B; COVID-19; Acne Vulgaris
	B4GALT1	Beta-1,4-galactosyltransferase 1	N-Acetylglucosamine; 6-Aminohexyl-uridine-C1,5'-diphosphate; N-acetyl-beta-D-glucosaminyl-(1->4)-N-acetyl-beta-D-glucosamine; Galactose-uridine-5'-diphosphate; Uridine monophosphate; 2-(N-morpholino)ethanesulfonic acid	Irritable Bowel Syndrome
Liver	HNMT	Histamine N-methyltransferase	SKF-91488; S-adenosyl-L-homocysteine; Quinacrine; Metoprine; Histamine; Harmaline	Lung Cancer; Leukemias; Melanoma; Metastatic Cancer
	DSP	Desmoplakin	Zinc; Artenimol; Zinc acetate	Diarrhea; Pneumonia; Upper Respiratory Tract Infection; Type 2 Diabetes Mellitus; Acne Vulgaris; Malaria; Wilson’s Disease
	SOD2	Superoxide dismutase [Mn], mitochondrial	Benzylsulfonic acid; 3-Fluoro-L-tyrosine; Mangafodipir; Polaprezinc; Thimerosal; Benzoyl peroxide	Cancer; Neurotoxic Disorders; Multiple Sclerosis; Epilepsy; Influenza; Viral Hepatitis B; COVID-19; Acne Vulgaris
	RHEB	GTP-binding protein Rheb	Guanosine-5'-Triphosphate	NA
	TEK	Angiopoietin-1 receptor	Vandetanib; Regorafenib; Ponatinib; Ampicillin; Fostamatinib; Ripretinib; Tivozanib	Thyroid Cancer; Colorectal Neoplasms; Chronic Myeloid Leukemia; Breast Cancer; Kidney Stones/Urinary Tract Infection; Surgical Site Infections; Bacterial Skin Infections; Complicated Appendicitis; COVID-19; Immune Thrombocytopenia; Rheumatoid Arthritis; Warm Autoimmune Hemolytic Anemia; Renal Cell Carcinoma; Prostate Cancer
	B4GALT1	Beta-1,4-galactosyltransferase 1	N-Acetylglucosamine; 6-Aminohexyl-uridine-C1,5'-diphosphate; N-acetyl-beta-D-glucosaminyl-(1->4)-N-acetyl-beta-D-glucosamine; Galactose-uridine-5'-diphosphate; Uridine monophosphate; 2-(N-morpholino)ethanesulfonic acid	Irritable Bowel Syndrome
Kidney	SLC2A5	Solute carrier family 2, facilitated glucose transporter member 5	Fludeoxyglucose (18F); Invert sugar; D-glucose	Asthma; Abdominal Aortic Aneurysm; Type 1 Diabetes Mellitus; Type 2 Diabetes Mellitus; Anorectal Disorders; Dehydration; Hypernatremia; Hypokalemia; Hyponatremia; Heart Failure
	FDPS	Farnesyl pyrophosphate synthase	Pamidronic acid; Zoledronic acid; Alendronic acid; Ibandronate; Risedronic acid; ISOPENTENYL PYROPHOSPHATE; Minodronic acid; Dimethylallyl Diphosphate; Farnesyl diphosphate; Geranyl Diphosphate	Breast Cancer; Metastatic Cancer; Bone Loss; Prostate Cancer; Osteopenia; Liver Transplantation; Cystic Fibrosis; Chronic Allograft Nephropathy; Cirrhosis of the Liver; Bone Diseases
	HNMT
	DSP	Desmoplakin	Zinc; Artenimol; Zinc acetate	Diarrhea; Pneumonia; Upper Respiratory Tract Infection; Type 2 Diabetes Mellitus; Acne Vulgaris; Malaria; Wilson’s Disease
	SOD2	Superoxide dismutase [Mn], mitochondrial	Benzylsulfonic acid; 3-Fluoro-L-tyrosine; Mangafodipir; Polaprezinc; Thimerosal; Benzoyl peroxide	Cancer; Neurotoxic Disorders; Multiple Sclerosis; Epilepsy; Influenza; Viral Hepatitis B; COVID-19; Acne Vulgaris
Thyroid	HNMT	Histamine N-methyltransferase	SKF-91488; S-adenosyl-L-homocysteine; Quinacrine; Metoprine; Histamine; Harmaline	Lung Cancer; Leukemias; Melanoma; Metastatic Cancer
	SOD2	Superoxide dismutase [Mn], mitochondrial	Benzylsulfonic acid; 3-Fluoro-L-tyrosine; Mangafodipir; Polaprezinc; Thimerosal; Benzoyl peroxide	Cancer; Neurotoxic Disorders; Multiple Sclerosis; Epilepsy; Influenza; Viral Hepatitis B; COVID-19; Acne Vulgaris
	B4GALT1	Beta-1,4-galactosyltransferase 1	N-Acetylglucosamine; 6-Aminohexyl-uridine-C1,5'-diphosphate; N-acetyl-beta-D-glucosaminyl-(1->4)-N-acetyl-beta-D-glucosamine; Galactose-uridine-5'-diphosphate; Uridine monophosphate; 2-(N-morpholino)ethanesulfonic acid	Irritable Bowel Syndrome
